# Supplementary material for: Solid-state thermo- and photochromism in N,N′-bis(5-X-salicylidene)diamines (X = H, Br)
Source: Royal Society of Chemistry journal article supplement (doi:10.1039/c2ra21631k), 2012-01-01
Supplement: c2ra21631k.pdf [file c2ra21631k.pdf]

## Electronic Supplementary Information

### Solid-state thermo- and photochromism in *N,N'*-bis(5-*X*-salicylidene)diamines (*X* = H, Br)

Damir A. Safin,<sup>a</sup> Koen Robeyns<sup>a</sup> and Yann Garcia<sup>\*a</sup>

<sup>a</sup> Institute of Condensed Matter and Nanosciences, MOST – Inorganic Chemistry, Université Catholique de Louvain, Place L. Pasteur 1, 1348 Louvain-la-Neuve, Belgium. Fax: +32(0) 1047 2330; Tel: +32(0) 1047 2831; E-mail: yann.garcia@uclouvain.be, damir.safin@ksu.ru

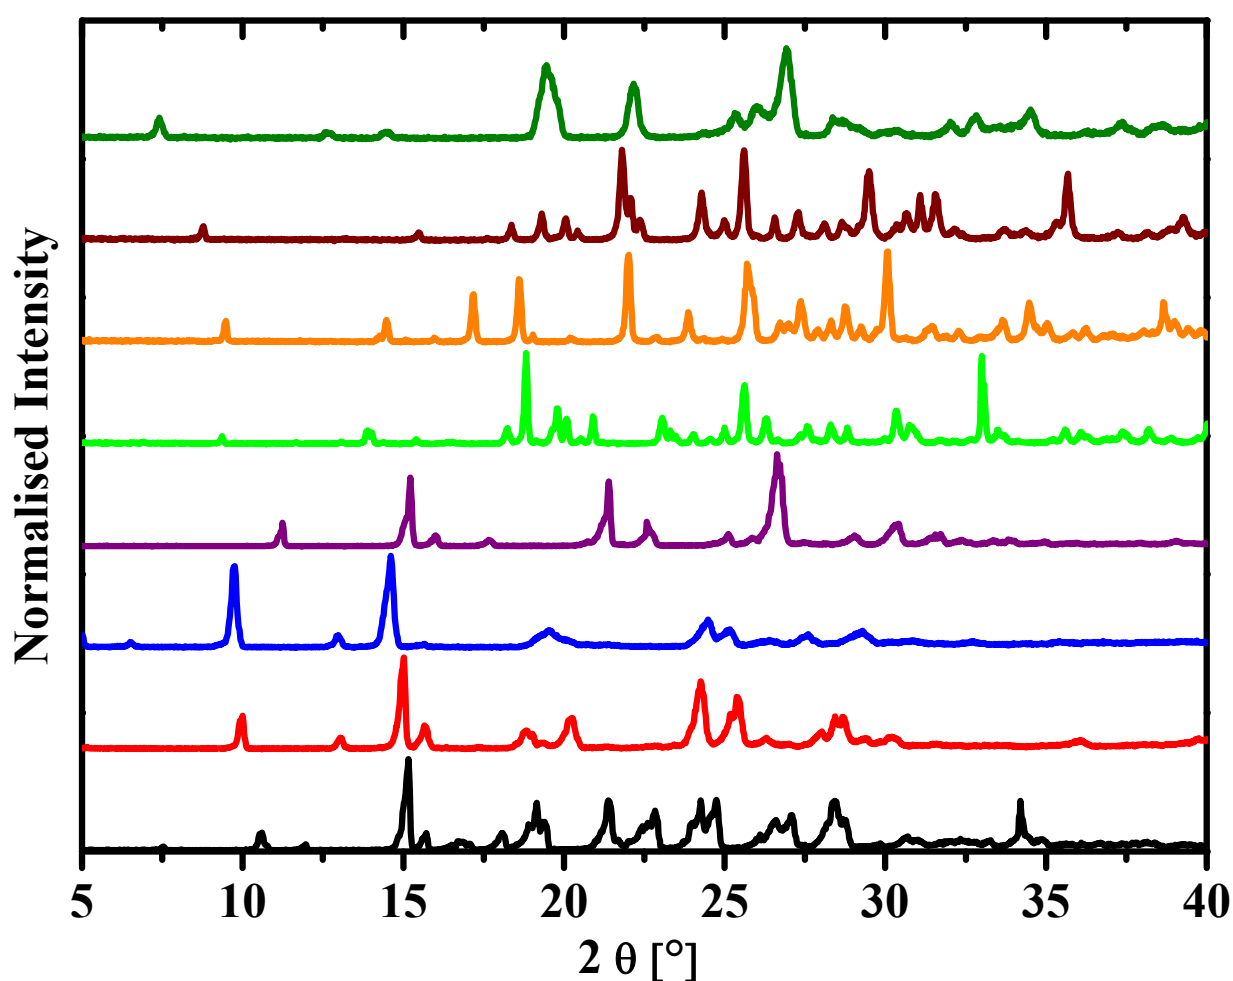

**Fig. S1** Powder X-ray diffraction patterns of **1a** (black), **2a** (red), **3a** (blue), **4a** (purple), **1b** (green), **2b** (orange), **3b** (brown) and **4b** (olive).

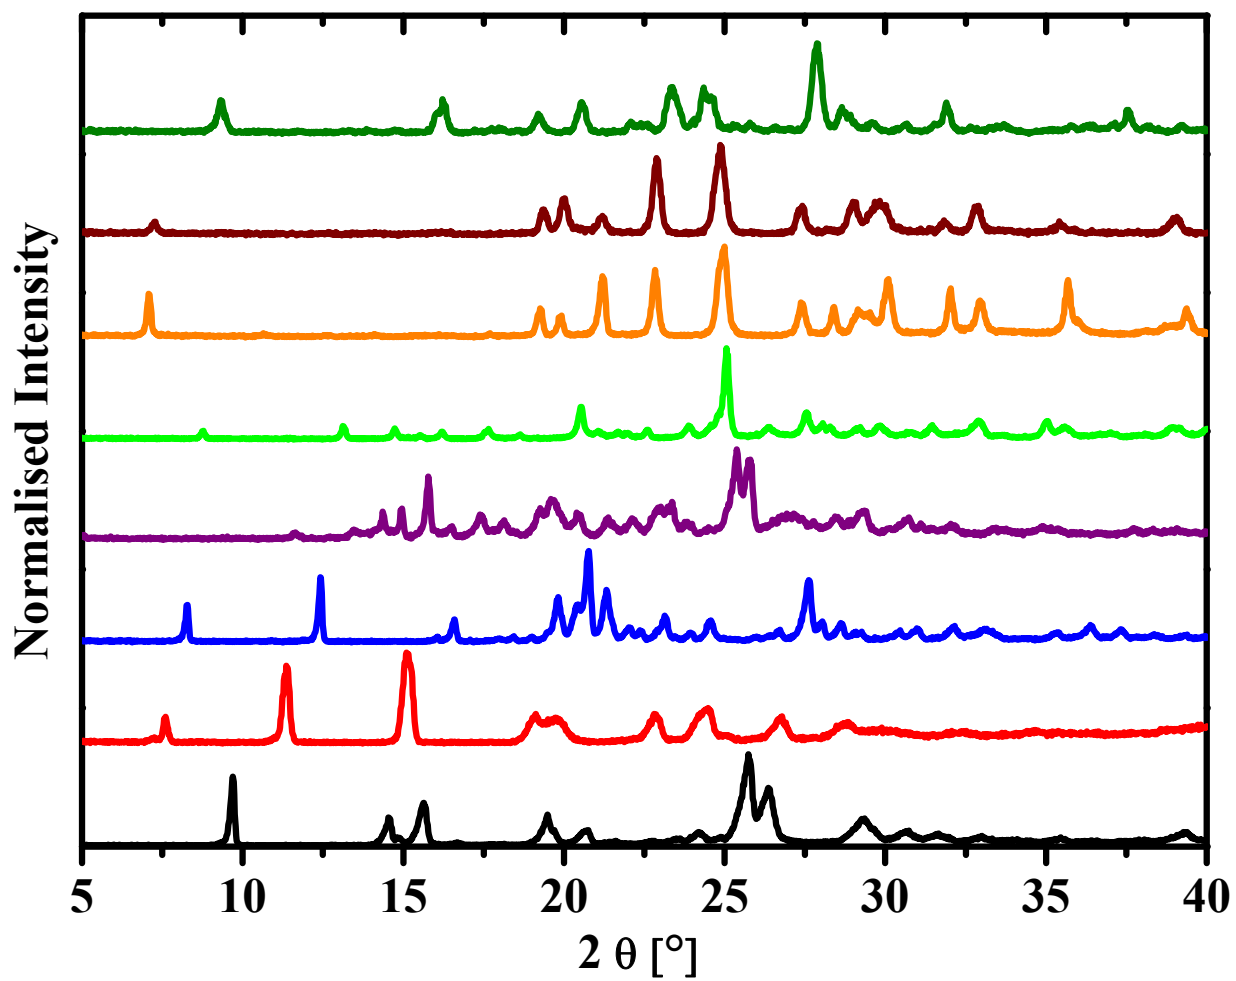

**Fig. S2** Powder X-ray diffraction patterns of **5a** (black), **6a** (red), **7a** (blue), **8a** (purple), **5b** (green), **6b** (orange), **7b** (brown) and **8b** (olive).

**Table S1** Selected bond lengths (Å) and bond angles (°) for **2a**, **6a**, **7a**, **8a** and **4b**

|                                                                                                                                                                                                                                                                                                                                                                                                                                                                                                                                                                                                                                                                                       | <b>2a<sup>a</sup></b> |                         | <b>6a<sup>b</sup></b> |                         | <b>7a<sup>c</sup></b> |                       | <b>8a<sup>d</sup></b> |                           | <b>4b<sup>e</sup></b> |  |
|---------------------------------------------------------------------------------------------------------------------------------------------------------------------------------------------------------------------------------------------------------------------------------------------------------------------------------------------------------------------------------------------------------------------------------------------------------------------------------------------------------------------------------------------------------------------------------------------------------------------------------------------------------------------------------------|-----------------------|-------------------------|-----------------------|-------------------------|-----------------------|-----------------------|-----------------------|---------------------------|-----------------------|--|
| <i>Bond lengths</i>                                                                                                                                                                                                                                                                                                                                                                                                                                                                                                                                                                                                                                                                   |                       |                         |                       |                         |                       |                       |                       |                           |                       |  |
| O(15)–C(14)                                                                                                                                                                                                                                                                                                                                                                                                                                                                                                                                                                                                                                                                           | 1.357(3)              | O(1)–C(2)               | 1.342(3)              | O(16)–C(15)             | 1.346(3)              | O(18)–C(17)           | 1.350(3)              | O(8)–C(5)                 | 1.347(5)              |  |
| O(24)–C(23)                                                                                                                                                                                                                                                                                                                                                                                                                                                                                                                                                                                                                                                                           | 1.357(3)              | O(31)–C(30)             | 1.350(3)              | O(31)–C(30)             | 1.352(3)              | N(10)–C(7)            | 1.423(3)              | N(10)–N(10)ja             | 1.406(4)              |  |
| N(7)–C(6)                                                                                                                                                                                                                                                                                                                                                                                                                                                                                                                                                                                                                                                                             | 1.423(3)              | N(9)–C(8)               | 1.273(3)              | N(8)–C(5)               | 1.422(2)              | N(10)–C(11)           | 1.281(3)              | N(10)–C(9)                | 1.259(5)              |  |
| N(7)–C(8)                                                                                                                                                                                                                                                                                                                                                                                                                                                                                                                                                                                                                                                                             | 1.288(3)              | N(9)–C(10)              | 1.403(3)              | N(8)–C(9)               | 1.276(3)              | C(11)–C(12)           | 1.451(4)              | C(4)–C(9)                 | 1.456(5)              |  |
| N(16)–C(2)                                                                                                                                                                                                                                                                                                                                                                                                                                                                                                                                                                                                                                                                            | 1.436(3)              | N(23)–C(20)             | 1.403(3)              | N(23)–C(20)             | 1.413(3)              |                       |                       |                           |                       |  |
| N(16)–C(17)                                                                                                                                                                                                                                                                                                                                                                                                                                                                                                                                                                                                                                                                           | 1.279(3)              | N(23)–C(24)             | 1.302(3)              | N(23)–C(24)             | 1.279(3)              |                       |                       |                           |                       |  |
| C(8)–C(9)                                                                                                                                                                                                                                                                                                                                                                                                                                                                                                                                                                                                                                                                             | 1.449(4)              | C(7)–C(8)               | 1.419(3)              | C(9)–C(10)              | 1.447(3)              |                       |                       |                           |                       |  |
| C(17)–C(18)                                                                                                                                                                                                                                                                                                                                                                                                                                                                                                                                                                                                                                                                           | 1.450(3)              | C(24)–C(25)             | 1.413(3)              | C(24)–C(25)             | 1.444(3)              |                       |                       |                           |                       |  |
| <i>Bond angles</i>                                                                                                                                                                                                                                                                                                                                                                                                                                                                                                                                                                                                                                                                    |                       |                         |                       |                         |                       |                       |                       |                           |                       |  |
| C(6)–N(7)–C(8)                                                                                                                                                                                                                                                                                                                                                                                                                                                                                                                                                                                                                                                                        | 120.0(2)              | C(8)–N(9)–C(10)         | 121.6(2)              | C(5)–N(8)–C(9)          | 122.57(17)            | C(7)–N(10)–C(11)      | 121.7(2)              | N(10)–C(9)–C(4)           | 121.7(4)              |  |
| C(2)–N(16)–C(17)                                                                                                                                                                                                                                                                                                                                                                                                                                                                                                                                                                                                                                                                      | 121.7(2)              | C(20)–N(23)–C(24)       | 122.2(2)              | C(20)–N(23)–C(24)       | 123.22(19)            |                       |                       |                           |                       |  |
| <i>Torsion angles</i>                                                                                                                                                                                                                                                                                                                                                                                                                                                                                                                                                                                                                                                                 |                       |                         |                       |                         |                       |                       |                       |                           |                       |  |
| C(3)–C(2)–N(16)–C(17)                                                                                                                                                                                                                                                                                                                                                                                                                                                                                                                                                                                                                                                                 | –9.8(4)               | C(8)–N(9)–C(10)–C(11)   | –43.5(2)              | C(6)–C(5)–N(8)–C(9)     | –4.3(3)               | C(11)–N(10)–C(7)–C(8) | 17.0(4)               | C(9)–N(10)–N(10)ja–C(9)ja | 180.0(3)              |  |
| C(5)–C(6)–N(7)–C(8)                                                                                                                                                                                                                                                                                                                                                                                                                                                                                                                                                                                                                                                                   | 38.1(3)               | C(24)–N(23)–C(20)–C(19) | –41.1(2)              | C(19)–C(20)–N(23)–C(24) | –0.8(3)               |                       |                       |                           |                       |  |
| <i>Dihedral angles (°)</i>                                                                                                                                                                                                                                                                                                                                                                                                                                                                                                                                                                                                                                                            |                       |                         |                       |                         |                       |                       |                       |                           |                       |  |
| Cg(1)–Cg(2)                                                                                                                                                                                                                                                                                                                                                                                                                                                                                                                                                                                                                                                                           | 46.53(12)             | Cg(1)–Cg(2)             | 51.64(9)              | Cg(1)–Cg(2)             | 3.22(11)              | Cg(1)–Cg(2)           | 14.53(13)             | Cg(1)–Cg(1)               | 0                     |  |
| Cg(1)–Cg(3)                                                                                                                                                                                                                                                                                                                                                                                                                                                                                                                                                                                                                                                                           | 5.77(13)              | Cg(3)–Cg(4)             | 50.40(9)              | Cg(3)–Cg(4)             | 2.13(11)              | Cg(1)–Cg(1)           | 80.66(10)             |                           |                       |  |
|                                                                                                                                                                                                                                                                                                                                                                                                                                                                                                                                                                                                                                                                                       |                       | Cg(2)–Cg(3)             | 53.72(8)              | Cg(1)–Cg(3)             | 73.63(10)             |                       |                       |                           |                       |  |
| <sup>a</sup> Cg(1): C(1)–C(2)–C(3)–C(4)–C(5)–C(6), Cg(2): C(9)–C(10)–C(11)–C(12)–C(13)–C(14), Cg(3): C(18)–C(19)–C(20)–C(21)–C(22)–C(23).<br><sup>b</sup> Cg(1): C(2)–C(3)–C(4)–C(5)–C(6)–C(7), Cg(2): C(10)–C(11)–C(12)–C(13)–C(14)–C(15), Cg(3): C(17)–C(18)–C(19)–C(20)–C(21)–C(22), Cg(4): C(25)–C(26)–C(27)–C(28)–C(29)–C(30).<br><sup>c</sup> Cg(1): C(2)–C(3)–C(4)–C(5)–C(6)–C(7), Cg(2): C(10)–C(11)–C(12)–C(13)–C(14)–C(15), Cg(3): C(17)–C(18)–C(19)–C(20)–C(21)–C(22), Cg(4): C(25)–C(26)–C(27)–C(28)–C(29)–C(30).<br><sup>d</sup> Cg(1): C(4)–C(5)–C(6)–C(7)–C(8)–C(9), Cg(2): C(12)–C(13)–C(14)–C(15)–C(16)–C(17).<br><sup>e</sup> Cg(1): C(2)–C(3)–C(4)–C(5)–C(6)–C(7). |                       |                         |                       |                         |                       |                       |                       |                           |                       |  |

**Table S2** Selected hydrogen bond lengths (Å) and angles (°) for **2a**, **6a**, **7a**, **8a** and **4b**

| Compound              | D–H···A             | <i>d</i> (D–H) | <i>d</i> (H···A) | <i>d</i> (D···A) | ∠(DHA) |
|-----------------------|---------------------|----------------|------------------|------------------|--------|
| <b>2a<sup>a</sup></b> | O(15)–H(15)···N(7)  | 0.82           | 1.90             | 2.627(3)         | 148    |
|                       | O(24)–H(24)···N(16) | 0.82           | 1.90             | 2.629(3)         | 147    |
|                       | C(5)–H(5)···O(15)#1 | 0.93           | 2.55             | 3.366(3)         | 147    |
| <b>6a</b>             | O(1)–H(1)···N(9)    | 0.82           | 1.87             | 2.606(3)         | 148    |
|                       | O(31)–H(31)···N(23) | 0.82           | 1.88             | 2.603(3)         | 147    |
| <b>7a</b>             | O(16)–H(16)···N(8)  | 0.82           | 1.88             | 2.605(2)         | 148    |
|                       | O(31)–H(31)···N(23) | 0.82           | 1.86             | 2.587(2)         | 147    |
| <b>8a<sup>a</sup></b> | O(18)–H(18)···N(10) | 0.80           | 1.89             | 2.604(3)         | 148    |
|                       | C(5)–H(5)···O(2)#2  | 0.93           | 2.59             | 3.245(3)         | 128    |
| <b>4b</b>             | O(8)–H(8)···N(10)   | 0.82           | 1.94             | 2.656(5)         | 145    |

<sup>a</sup>Symmetry transformations used to generate equivalent atoms: #1 *x*, *-1 + y*, *z*; #2 *-x*, *1 - y*, *-z*.

**Table S3** Selected  $\pi \cdots \pi$  interactions for **2a**, **6a**, **7a**, **8a** and **4b**

| Compound              | Cg(I) | Cg(J) | Cg–Cg (Å)  | Dihedral angle (°) | $\beta$ (°) |
|-----------------------|-------|-------|------------|--------------------|-------------|
| <b>2a<sup>a</sup></b> | Cg(1) | Cg(2) | 4.7953(15) | 46.53(12)          | 15.77       |
|                       | Cg(1) | Cg(2) | 4.7982(15) | 46.53(12)          | 17.36       |
|                       | Cg(2) | Cg(1) | 4.8277(15) | 46.53(12)          | 20.54       |
|                       | Cg(2) | Cg(1) | 4.7656(15) | 46.53(12)          | 18.80       |
|                       | Cg(3) | Cg(3) | 4.7453(16) | 42                 | 19.79       |
|                       | Cg(3) | Cg(3) | 4.8905(16) | 42                 | 22.75       |
| <b>6a<sup>b</sup></b> | Cg(1) | Cg(4) | 4.7140(14) | 45.56              | 15.28       |
|                       | Cg(1) | Cg(4) | 4.7214(15) | 45.56              | 16.98       |
|                       | Cg(2) | Cg(3) | 4.7804(12) | 57.85              | 15.57       |
|                       | Cg(2) | Cg(3) | 4.6516(13) | 57.85              | 16.36       |
|                       | Cg(3) | Cg(2) | 4.6636(13) | 57.85              | 16.25       |
|                       | Cg(3) | Cg(2) | 4.7712(12) | 57.85              | 15.19       |
|                       | Cg(4) | Cg(1) | 4.6469(14) | 45.56              | 17.61       |
|                       | Cg(4) | Cg(1) | 4.7849(15) | 45.56              | 17.98       |
| <b>7a<sup>c</sup></b> | Cg(1) | Cg(3) | 4.9959(13) | 76.70(10)          | 10.70       |
|                       | Cg(1) | Cg(3) | 5.0680(13) | 76.70(10)          | 13.51       |
|                       | Cg(2) | Cg(2) | 5.2968(14) | 0                  | 56.04       |
|                       | Cg(2) | Cg(4) | 5.1328(15) | 76.44(12)          | 7.44        |
|                       | Cg(2) | Cg(4) | 4.9492(15) | 76.44(12)          | 17.48       |
|                       | Cg(3) | Cg(1) | 5.1278(13) | 73.63(10)          | 67.60       |
|                       | Cg(3) | Cg(1) | 5.2384(13) | 76.70(10)          | 19.81       |
|                       | Cg(4) | Cg(2) | 5.2475(15) | 76.44(12)          | 16.65       |
| <b>8a<sup>d</sup></b> | Cg(1) | Cg(1) | 4.9252(19) | 81                 | 49.68       |
|                       | Cg(1) | Cg(2) | 4.679(2)   | 14.53(13)          | 45.77       |
|                       | Cg(2) | Cg(1) | 4.678(2)   | 14.53(13)          | 41.85       |
| <b>4b<sup>e</sup></b> | Cg(1) | Cg(1) | 3.756(2)   | 0                  | 23.68       |
|                       | Cg(1) | Cg(1) | 3.768(2)   | 0                  | 12.15       |

<sup>a</sup>Cg(1): C(1)–C(2)–C(3)–C(4)–C(5)–C(6), Cg(2): C(9)–C(10)–C(11)–C(12)–C(13)–C(14), Cg(3): C(18)–C(19)–C(20)–C(21)–C(22)–C(23).  
<sup>b</sup>Cg(1): C(2)–C(3)–C(4)–C(5)–C(6)–C(7), Cg(2): C(10)–C(11)–C(12)–C(13)–C(14)–C(15), Cg(3): C(17)–C(18)–C(19)–C(20)–C(21)–C(22), Cg(4): C(25)–C(26)–C(27)–C(28)–C(29)–C(30).  
<sup>c</sup>Cg(1): C(2)–C(3)–C(4)–C(5)–C(6)–C(7), Cg(2): C(10)–C(11)–C(12)–C(13)–C(14)–C(15), Cg(3): C(17)–C(18)–C(19)–C(20)–C(21)–C(22), Cg(4): C(25)–C(26)–C(27)–C(28)–C(29)–C(30).  
<sup>d</sup>Cg(1): C(4)–C(5)–C(6)–C(7)–C(8)–C(9), Cg(2): C(12)–C(13)–C(14)–C(15)–C(16)–C(17).  
<sup>e</sup>Cg(1): C(2)–C(3)–C(4)–C(5)–C(6)–C(7).
